# Supplementary material
Source: HighWire-hosted journal article supplement (https://jme.bmj.com/highwire/filestream/144807/field_highwire_adjunct_files/0/Appendix42770.docx)
Supplement: Appendix42770.docx [file Appendix42770.docx]

This questionnaire is exploring medical students’ views on issues linked to conscientious objection, such as abortion, alcohol, drugs, examining the opposite sex and the contraceptive pill.

It is being undertaken for my second year SSM. I am aiming to explore the differing views of conscientious objection amongst medical students.

Participation is entirely voluntary. The questionnaire takes a couple of minutes to complete and is anonymous. If you are not comfortable answering any particular questions, please leave those blank. Please feel free to write any additional comments at the end, or leave your contact details if you would be prepared to discuss any issues further.

This project has been considered by the Wandsworth Research Ethics Committee and was considered not to require full ethical review.

**QUESTIONNAIRE**

Please tick the relevant boxes below.

**1. Course studied:**

⁪5 year MBBS Medicine

⁪GEP MBBS Medicine

⁪MBChB/MBBCh Medicine

**2. Gender:**

⁪Male

⁪Female

**3. Religion:**

⁪None

⁪Atheist

⁪Hindu

⁪Sikh

⁪Buddhist

⁪Muslim

⁪Roman Catholic

⁪Protestant

⁪Jewish

⁪Mormon

⁪Eastern Orthodox

⁪Other (please specify)…………

1. **Ethnic origin:**

⁪ White British

⁪ White Irish

⁪ White other

⁪ Indian or Indian British

⁪ Pakistani or Pakistani British

⁪ Bangladeshi or Bangladeshi British

⁪ Other Asian or Other Asian British

⁪ Black Caribbean or Black Caribbean British

⁪ Black African or Black African British

⁪ Other Black or Black British

⁪ Chinese or Chinese British

⁪ Mixed White and Black Caribbean

⁪ Mixed White and Black African

⁪ Mixed White and Asian

⁪ Other Mixed

⁪ Other (please specify)…………………..

**5. Do you think that doctors should be entitled to object to *any* procedure for which they have a moral, cultural or religious disagreement?**

YES⁪ NO⁪ NOT SURE⁪

**6. Please note if you object to any of the following medical practices, and if so, whether your objection is for religious reasons, reasons unrelated to religion, or both**

|  | I have no objection | I have religious objections | I have non-religious objections | I have both religious and non-religious objections |
| --- | --- | --- | --- | --- |
| Abortion for congenital abnormalities before 24 weeks |  |  |  |  |
| Abortion for congenital abnormalities after 24 weeks |  |  |  |  |
| Abortion for failed contraception before 24 weeks |  |  |  |  |
| Abortion for a raped minor before 24 weeks |  |  |  |  |
| Abortion for a raped minor after 24 weeks |  |  |  |  |
| Learning about the moral arguments surrounding abortion at medical school |  |  |  |  |
| Prescription of birth control to a female who is deemed competent |  |  |  |  |
| Examining or treating a patient intoxicated with alcohol |  |  |  |  |
| Learning about the clinical impact of alcohol at medical school |  |  |  |  |
| Examining or treating a patient intoxicated with drugs |  |  |  |  |
| Intimately examining a person of the opposite sex |  |  |  |  |

1. **If you noted an objection to any of the medical practices above, please indicate below if you would still perform the procedure despite this objection**

|  | YES | NO |
| --- | --- | --- |
| Abortion for congenital abnormalities before 24 weeks |  |  |
| Abortion for congenital abnormalities after 24 weeks |  |  |
| Abortion for failed contraception before 24 weeks |  |  |
| Abortion for a raped minor before 24 weeks |  |  |
| Abortion for a raped minor after 24 weeks |  |  |
| Learning about the moral arguments surrounding abortion at medical school |  |  |
| Prescription of birth control to a female who is deemed competent |  |  |
| Examining or treating a patient intoxicated with alcohol |  |  |
| Learning about the clinical impact of alcohol at medical school |  |  |
| Examining or treating a patient intoxicated with drugs |  |  |
| Intimately examining a person of the opposite sex |  |  |

**8. If you have expressed an objection to any of the issues raised, please explain your reasons below:**

**9. If you would be prepared for me to contact you to discuss any issues further, please leave your contact details below:**

**Thank you for completing this questionnaire.**

If any questions asked within this questionnaire have raised sensitive or emotional issues, please contact one of the support groups below:

- University counseling service
- BMA free and confidential stress counseling service – 08459 200169
- CAREconfidential pregnancy and post-abortion helpline - 0800 028 2228 - a freephone service available to anyone female or male, which provide counseling, help and advice to those who find themselves facing an unplanned pregnancy or who are concerned after an abortion ([www.careconfidential.com](http://www.careconfidential.com))
